# Supplementary material for: Improving the hydrothermal stability of Pd/SSZ-13 for low-temperature NO adsorption: promotional effect of the Mg2+ co-cation
Source: Royal Society of Chemistry journal article supplement (doi:10.1039/d3re00024a), 2023-01-01
Supplement: d3re00024a1.pdf [file d3re00024a1.pdf]

## *Supplementary Information*

### **Improving the hydrothermal stability of Pd/SSZ-13 for the low-temperature NO adsorption: Promotional effect of Mg<sup>2+</sup> co-cation**

*Jinhuang Cai<sup>a</sup>, Huawang Zhao<sup>a\*</sup>, Xiang Li<sup>c</sup>, Guohua Jing<sup>a</sup>, Johannes W. Schwank<sup>b</sup>*

*a. Department of Environmental Science & Engineering, College of Chemical Engineering, Huaqiao University, Xiamen, Fujian 361021, China*

*b. Department of Chemical Engineering, University of Michigan, Ann Arbor, MI 48109, USA.*

*c. Department of Chemical and Metallurgical Engineering, School of Chemical Engineering, Aalto University, Espoo 02150, Finland*

---

\* Corresponding author: hwzhao@hqu.edu.cn

## Section S1

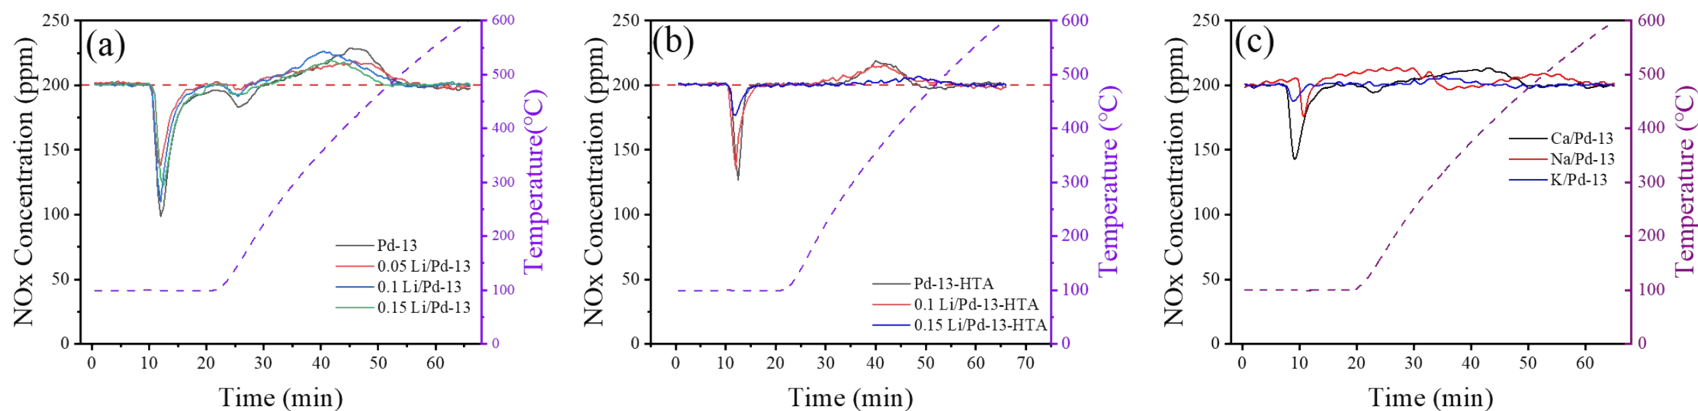

Fig. S1. The NO<sub>x</sub> profiles of Fresh (a) and HTA (b) Li/Pd-13 samples, (c) The NO<sub>x</sub> profiles of fresh alkaline (earth) metal doped Pd-13 samples.

Li/Pd/SSZ-13 and Na/Pd-SSZ-13 samples were prepared by a two-step incipient impregnation method. Firstly, Pd/SSZ-13 with a Pd loading of 1 wt.% were prepared by impregnating an appropriate amount of palladium nitrate solution. Li and Na loading were achieved by doping 1 mL LiNO<sub>3</sub> and NaNO<sub>3</sub> solution (0.07 mmol/L) on 1 g of Pd/SSZ-13, respectively. The catalysts were activated after calcination in a muffle furnace at 600 °C for 5 h. The ICP results show that the Na and Li loading in Na/Pd-SSZ-13 and Li/Pd-SSZ-13 is 83 and 75 μmol/g<sub>cata</sub>, respectively.

The Li doping decreased the NO<sub>x</sub> storage capacity of Pd-13 (Fig. S1a). The HTA stability also decreased in Li/Pd-13 compared to Pd-13 (Fig. S1b). The Na, K, Ca significantly decreased the NO<sub>x</sub> uptake ability (Fig. S1c).

## Section S2

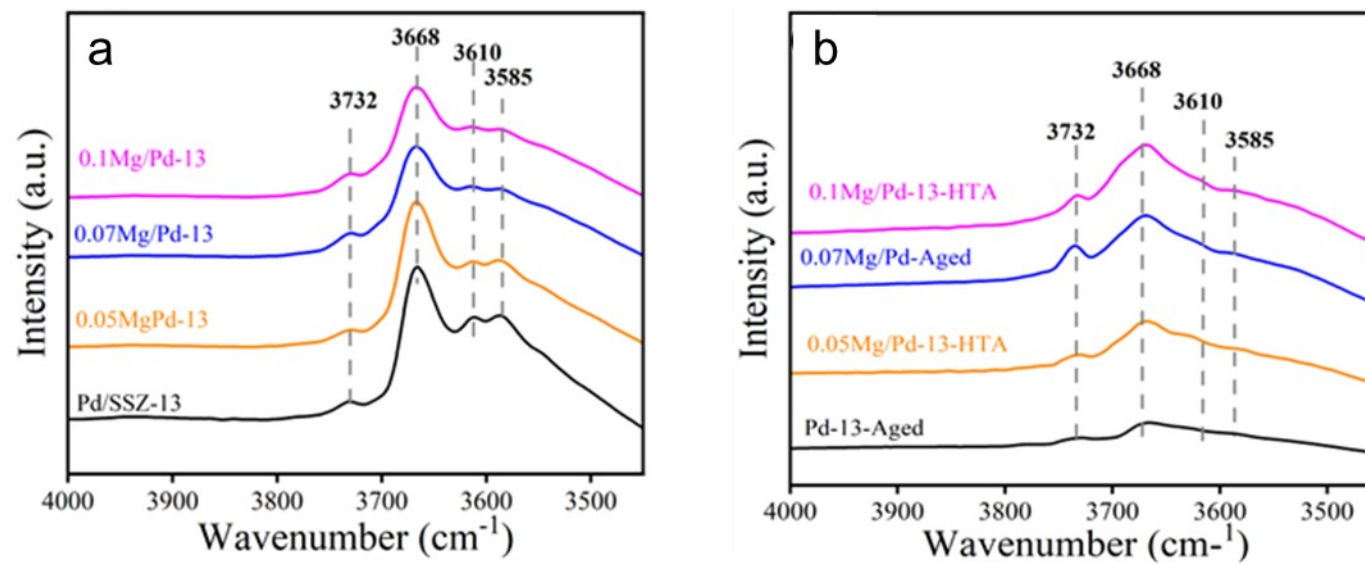

Fig S2. In situ DRIFTS spectra of fresh (a) and HTA (b) samples with a flow of 1000 ppm  $\text{NH}_3/\text{N}_2$  measured at 30 °C. Total flow rate was 50 mL/min.

### Section S3

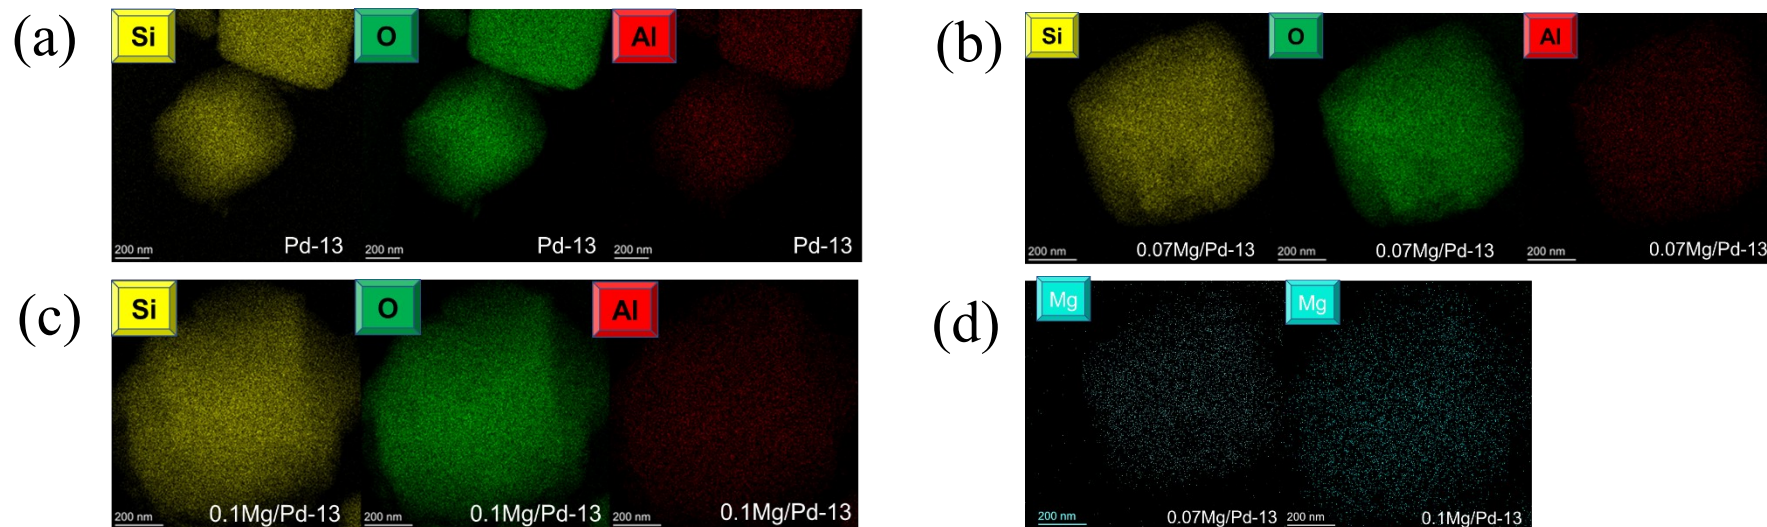

Fig S3 Mapping diagram of Si, O, Al and (Mg) elements in fresh samples.

The transmission electron microscope (TEM) images were pictured by a Tecnai G2 20 at an acceleration voltage of 200 kV. Before taking the images, the powder catalyst was suspended in ethanol, dispersed by ultrasonication, and then dropped onto lacey formvar/carbon 200 mesh copper grids.

## Section S4

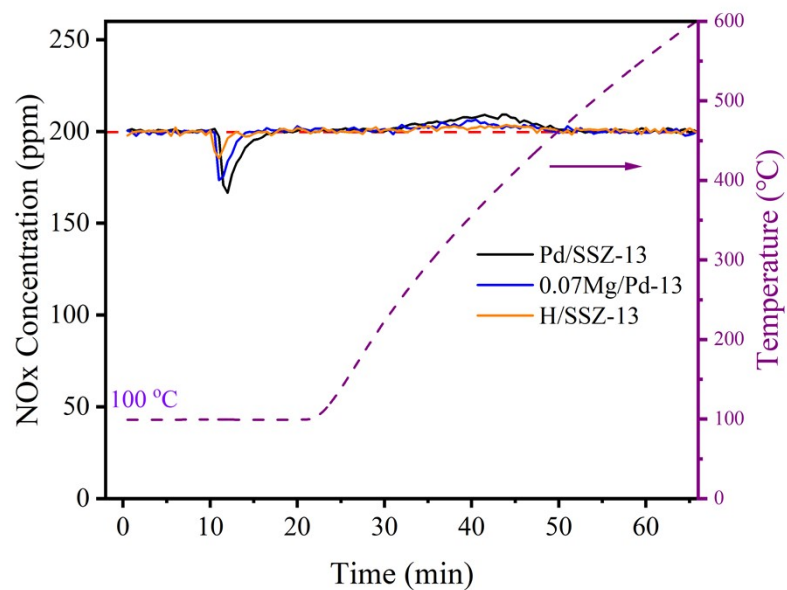

Fig S4. The NO<sub>x</sub> profiles of Fresh back-exchange Pd -13, 0.07Mg/Pd-13 and H/SSZ-13 samples for NO adsorption at 100 °C for 10 min followed with release (10 °C /min up to 600 °C). Reaction conditions: 200 mL min<sup>-1</sup> (200 ppm NO, 5 %vol O<sub>2</sub>, 5%vol H<sub>2</sub>O and balanced with N<sub>2</sub>). Note that during the first 10 min of data recording, the feed gas runs through the bypass line.

The NH<sub>4</sub><sup>+</sup>-exchanged sample showed similar NO<sub>x</sub> adsorption capacity to H-SSZ-13, indicating that the Pd<sup>2+</sup> ions were almost completely removed.

## Section S5

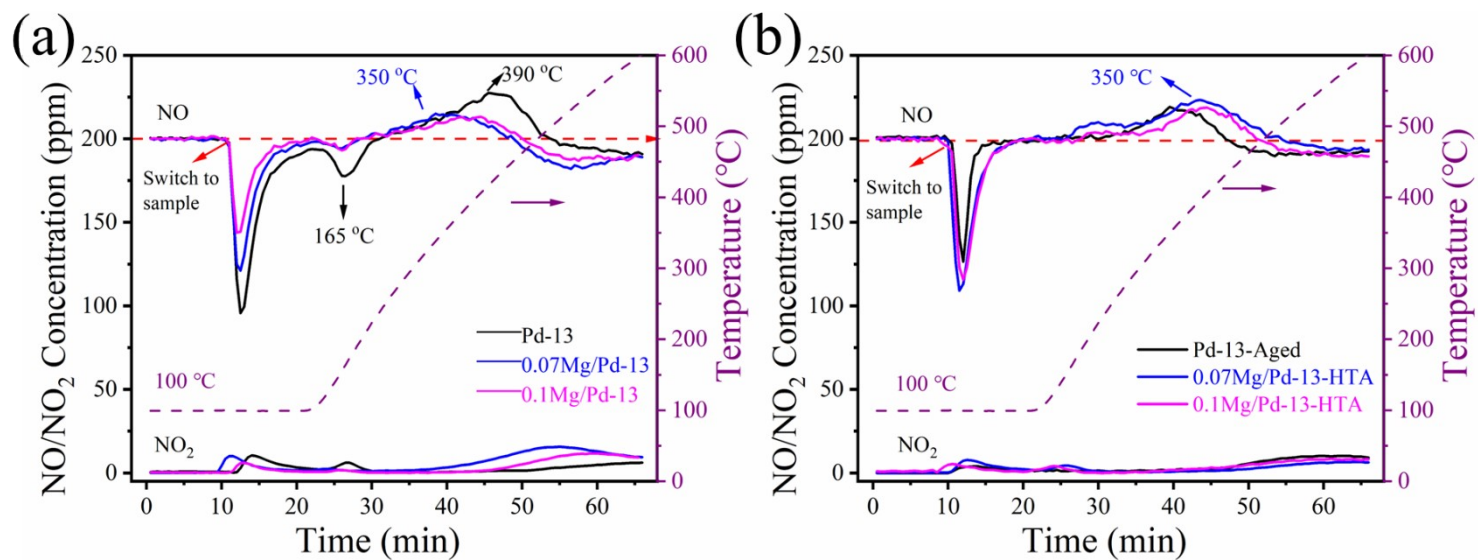

Fig. S5. The concentrations of NO and NO<sub>2</sub> of Fresh (a) and (b) Pd-13, 0.07Mg/Pd-13, 0.1Mg/Pd-13 samples during adsorption and release. Reaction conditions: 200 mL min<sup>-1</sup> (200 ppm NO, 5 %vol O<sub>2</sub>, 5%vol H<sub>2</sub>O and balanced with N<sub>2</sub>). Note that during the first 10 min of data recording, the feed gas runs through the bypass line.

## Section S6

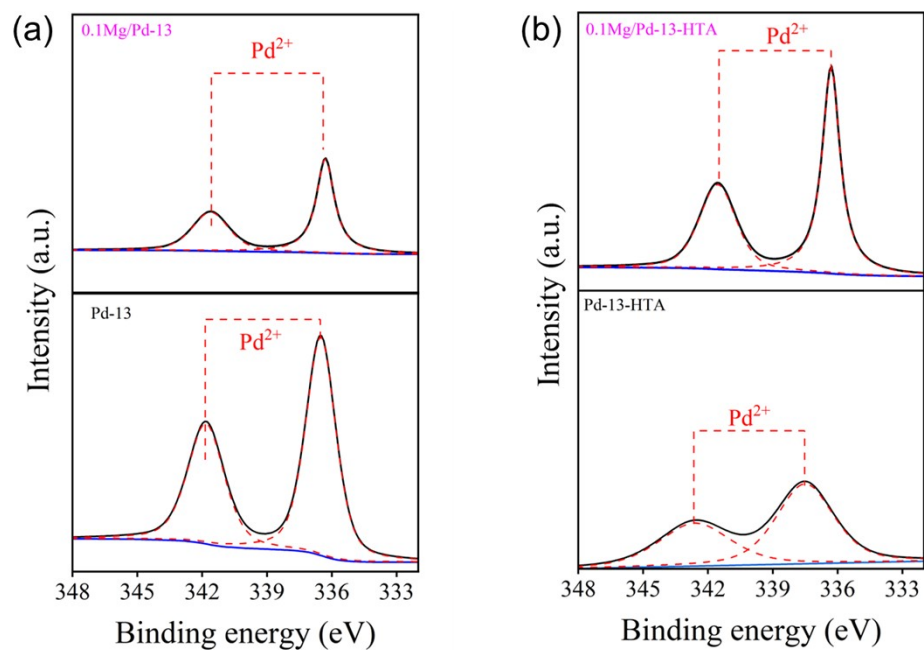

Fig S6. XPS of Fresh (a) and HTA (b) samples.

The X-ray photoelectron spectroscopy (XPS) was performed on a Thermo Scientific K-Alpha XPS instrument, using Mg K $\alpha$  as X-ray source (1253.6 eV) under a residual pressure of  $5 \times 10^{-6}$  Pa. The error of the binding energy is  $\pm 0.2$  eV using C 1 s at 284.6 eV as the standard.

### Section S7

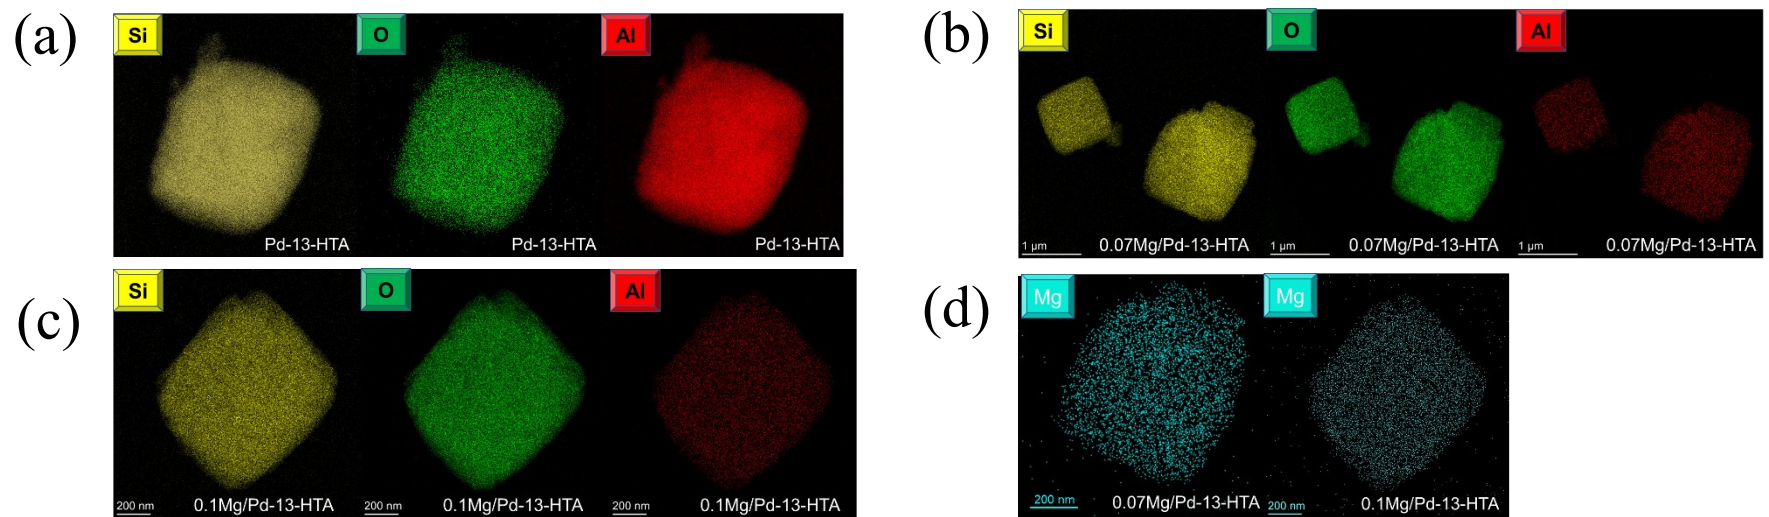

Fig S7. Mapping diagram of Si, O, Al and Mg elements in HTA samples.



## Section S8

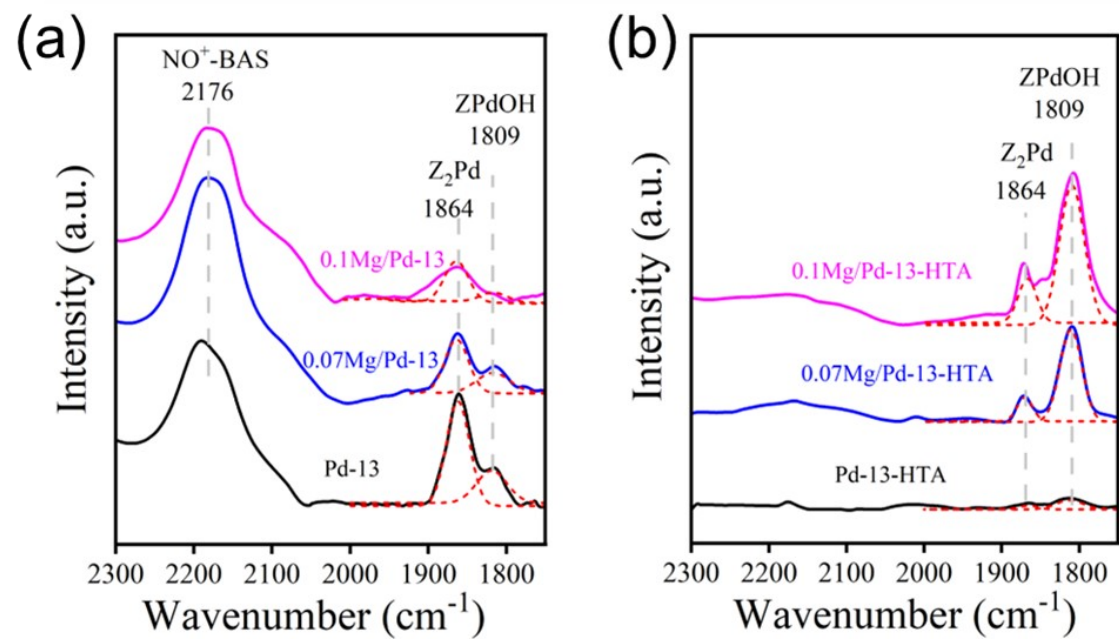

Fig. S8. The deconvolution peaks of NO adsorption curves in Fig.7.

For the IR spectra in Fig.7, the peaks are deconvoluted via Lorentzian/Gaussian fitting using Peakfit software, with the peak position not fixed for the best fit. All samples allow the fitting parameters in the deconvolution to be optimized.

## Section S9

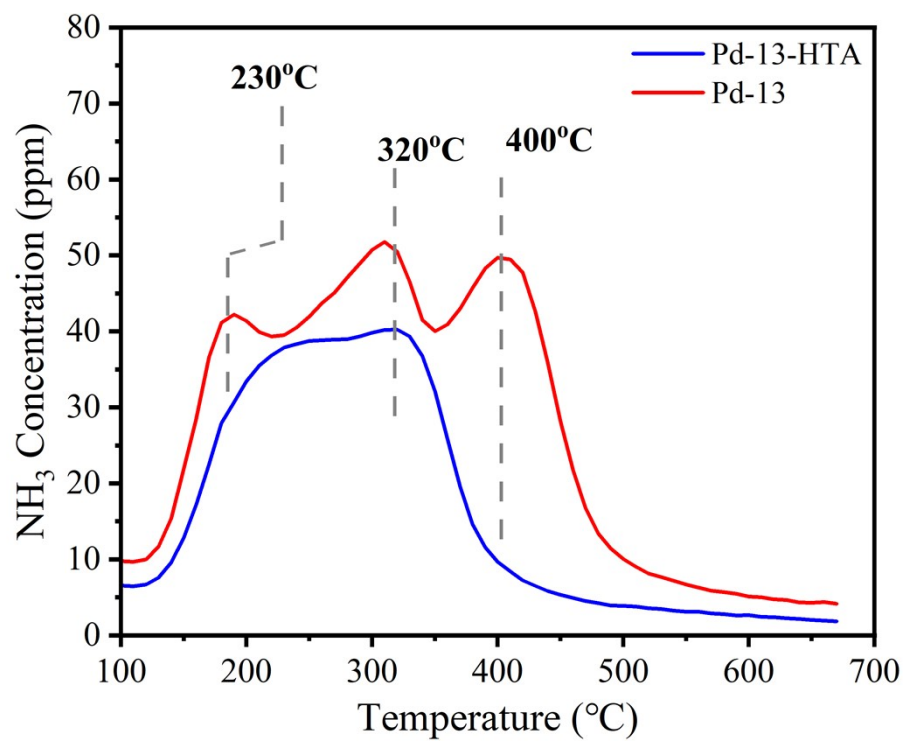

Fig S9.  $\text{NH}_3$ -TPD (a) profiles for H/zeolites, fresh Pd/SSZ-13, Mg/Pd-13 samples.

Section S10

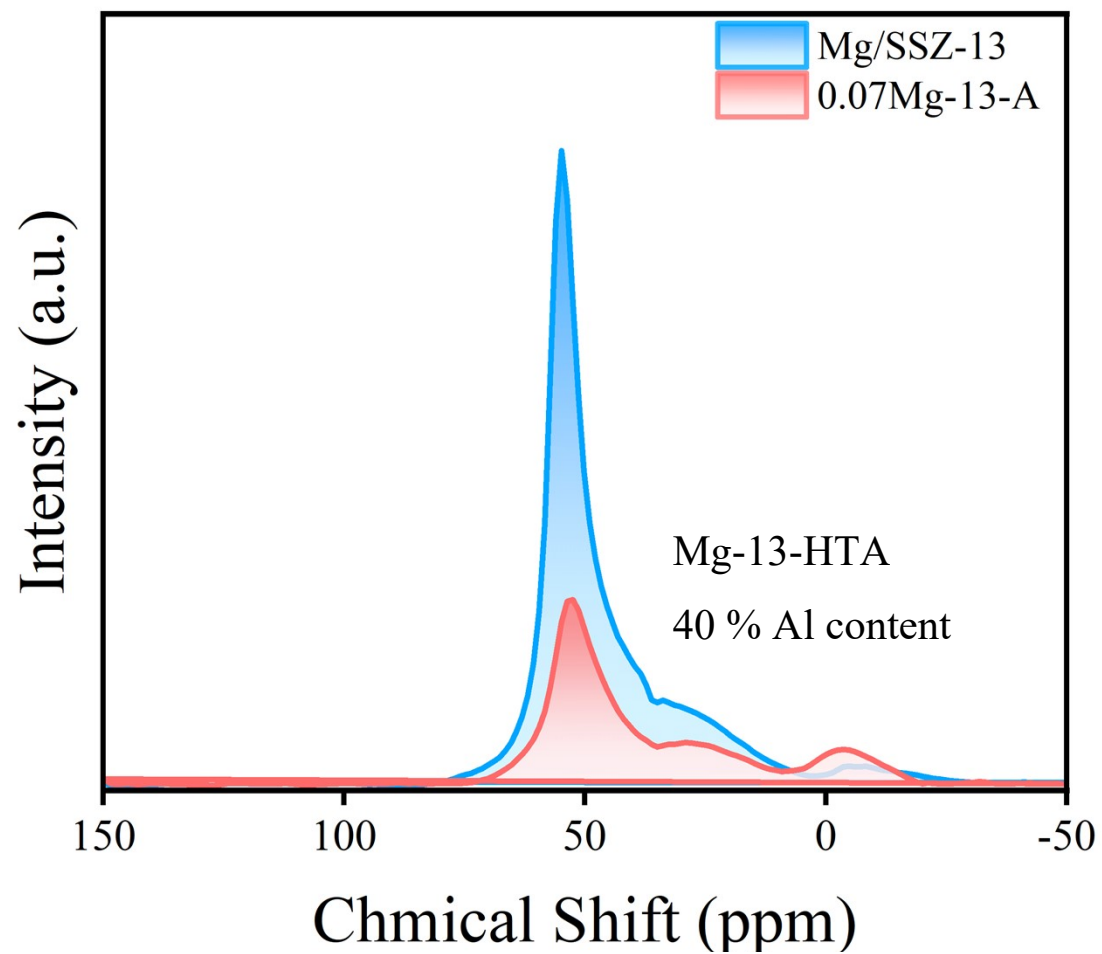

Fig. S10.  $^{27}\text{Al}$  MAS NMR spectra of Fresh and Aged 0.07Mg/SSZ-13 samples.

## Section S11

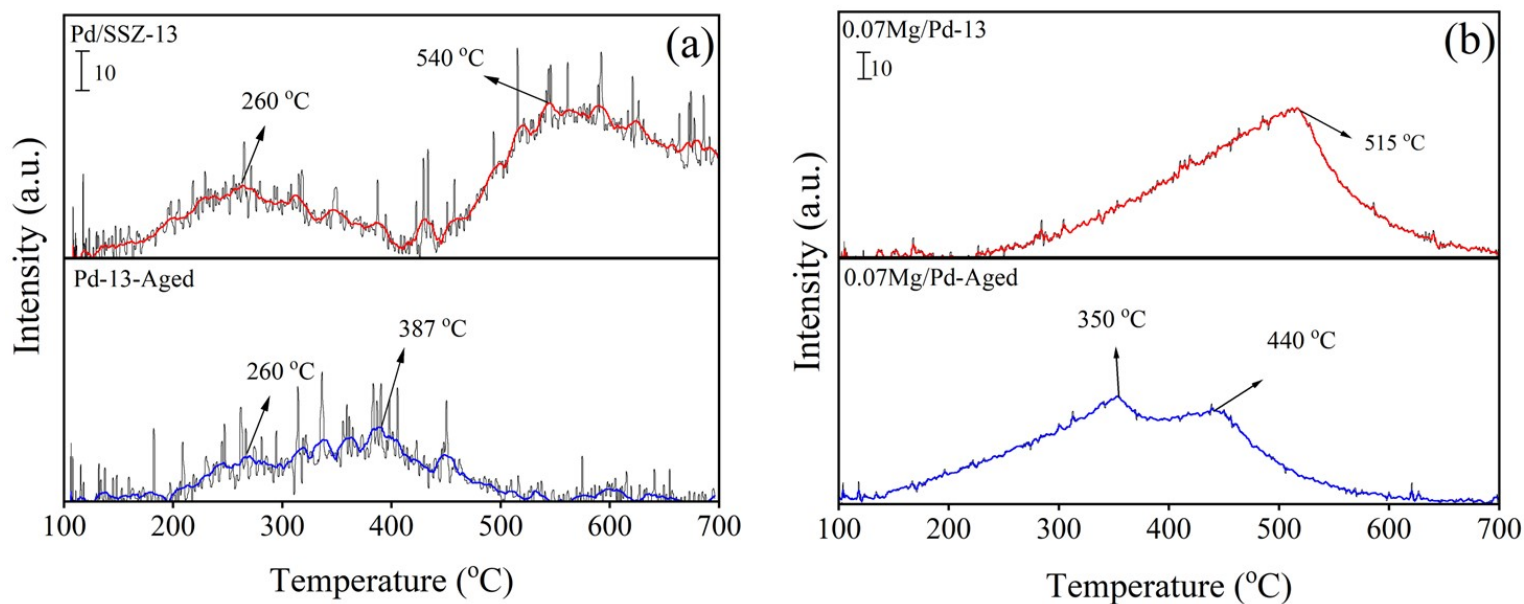

Fig. S11. (a) The H<sub>2</sub>O-TPD profiles of Pd/SSZ-13 and Pd-13-HTA, and (b) corresponding to 0.07Mg/Pd-13 and 0.07Mg/Pd-13-HTA.

### H<sub>2</sub>O-TPD test procedure:

- 1, To remove adsorbed species, 50mg of sample was heated to 500 °C, pretreated with 50 ml/min 10% O<sub>2</sub>/He for 30 min, and cooled to 100 °C;
2. Then, turn off O<sub>2</sub> and absorb H<sub>2</sub>O gas at the flow rate of 50 mL/min (5% H<sub>2</sub>O+10% O<sub>2</sub>/He) for 1 hour;
3. After the adsorption, purging the pipeline with airflow (10% O<sub>2</sub>/He) with a flow rate of 50 ml/min for 1 hour;
4. After purging, release the H<sub>2</sub>O at 100 °C to 600 °C at a flow rate of 50 ml/min (5% H<sub>2</sub>O+10% O<sub>2</sub>/He). The heating rate was 10 °C/min.

## Section 12

All calculations were performed using the Vienna Ab-initio Simulation Package (VASP) [1-2]. The Perdew-Burke-Ernzerhof (PBE) functional for the exchange correlation term was used with the projector augmented wave (PAW) potentials and a cutoff energy of 400 eV [3]. The convergence of energy and forces were set to  $1 \times 10^{-5}$  eV and 0.02 eV/Å, respectively. The binding energy ( $\Delta E_b$ ) was calculated as:  $\Delta E_b = E(\text{CHA-M}) - E(\text{M}) - E(\text{CHA})$ , where  $E(\text{CHA-M})$ ,  $E(\text{M})$ , and  $E(\text{CHA})$  are the energies of the CHA with doping atom Pd or Mg, doping atom Pd or Mg and the CHA, respectively.

- (1). G. Kresse, J. Furthmüller, Phys. Rev. B 1996, 54, 11169-11186.
- (2). G. Kresse, D. Joubert, Phys. Rev. B 1999, 59, 1758-1775.
- (3). J. P. Perdew, K. Burke, M. Ernzerhof, Phys. Rev. Lett. 1996, 77, 3865-3868
